# Supplementary material
Source: PubMed Central journal article supplement (PMC7092819)
Supplement: NEJMoa2002032_protocol.pdf [file NEJMoa2002032_protocol.pdf]

# Protocol

This trial protocol has been provided by the authors to give readers additional information about their work.

Protocol for: Guan W, Ni Z, Hu Y, et al. Clinical characteristics of coronavirus disease 2019 in China. *N Engl J Med*. DOI: 10.1056/NEJMoa2002032

# Study protocol

## Background

In early December 2019, the first pneumonia cases of unknown origins were identified in Wuhan city, Hubei province, China. High-throughput sequencing has revealed a novel betacoronavirus that is currently named 2019 novel coronavirus (2019-nCoV), which resembled severe acute respiratory syndrome coronavirus (SARS-CoV). The 2019-nCoV is the seventh member of enveloped RNA coronavirus (subgenus *sarbecovirus*, *Orthocoronavirinae* subfamily). Evidence pointing to the person-to-person transmission in hospital and family settings has been accumulating.

The World Health Organization has recently declared the 2019-nCoV a public health emergency of international concern. As of February 5<sup>th</sup>, 2020, 24,554 laboratory-confirmed cases have been documented globally (i.e., the USA, Vietnam, Germany). 28,018 laboratory-confirmed cases and 563 death cases in China as of February 6<sup>th</sup>, 2020. Despite the rapid spread worldwide, the clinical characteristics of 2019-nCoV acute respiratory disease (ARD) remain largely unclear. In two recent studies documenting the clinical manifestations of 41 and 99 patients respectively with laboratory-confirmed 2019-nCoV ARD who were admitted to Wuhan, the severity of some cases with 2019-nCoV ARD mimicked that of SARS-CoV.

## Objective

We sought to identify the defining epidemiological and clinical characteristics with greater precision, but also unravel the risk factors associated with mortality.

## Hypothesis

The clinical characteristics of patients with 2019-nCoV in our study cohort might differ from those reported recently given the increased sample size; greater disease severity might be associated with an increased risk of reaching to the composite endpoint.

## Study design

Retrospective study on the patients from provinces/autonomous regions/provincial municipalities across China. The time frame started from the 'first case' (November 2019) to the latest date when available (late January 2020).

## **Study participants**

### **Diagnostic criteria**

Cases will be diagnosed based on the WHO interim guidance. A confirmed case with 2019-nCoV ARD will be defined as a positive result to high-throughput sequencing or real-time reverse-transcriptase polymerase-chain-reaction (RT-PCR) assay for nasal and pharyngeal swab specimens

### **Inclusion criteria**

Only the laboratory-confirmed cases were included the analysis.

### **Exclusion criteria**

No exclusion criteria apply provided that the clinical profiles of the patients are as complete as possible, which would not prevent from the analysis of the composite endpoint.

## **Outcome assessment**

The primary composite endpoint will be the admission to intensive care unit (ICU), or mechanical ventilation, or death. Secondary endpoints comprised mortality rate, the time from symptom onset to the composite endpoint and each of its component. Because clinical observations were still ongoing, fixed time frame (i.e. within 28 days) will not be applied to these endpoints.

## **Definitions of exposure and clinical complications**

\*\* The exposure to wildlife denote that a person in close contact with wildlife animals (bats, snakes, civet cats, etc.) or visiting either a wildlife retailer or a market selling wildlife within two weeks before the onset of respiratory symptoms. However, the cases with regular visit to the market without recalling the exposure date will not be considered as having definite exposure to the wildlife.

\*\* Pneumonia will be diagnosed as an acute respiratory disorder characterized by the presence of cough and at least one of the new-onset focal chest signs, fever for more than 4 days or dyspnoea/tachypnoea.

\*\* Shock and acute respiratory distress syndrome (ARDS) will be defined in accordance with the WHO interim guidance.

\*\* Acute kidney injury will be defined based on the highest serum creatinine level and urine output. Specifically, the diagnosis could be made based on any of the following criterion: an increase in serum creatinine levels by 0.3 mg/dl or greater (26.5 µmol/l or greater) within 48 hours; or increase in serum creatinine levels to 1.5 times of the baseline level or greater, which was known or

presumed to have occurred within 7 days; or urine volume of below 0.5 ml/kg/h for 6 consecutive hours.

\*\* The diagnosis of secondary bacterial or fungal infection will be made in case of the occurrence of hospital-acquired pneumonia or bacteremia, plus a positive result of new pathogen culture from the blood and lower respiratory tract specimen (including sputum, bronchoalveolar lavage fluid or tracheal aspirate) obtained at least 8 hours after admission.

\*\* Acute heart failure will be defined as the clinical syndrome characterized by typical symptoms (e.g. breathlessness, ankle swelling and fatigue) that may be accompanied by signs (e.g. elevated jugular venous pressure, pulmonary crackles and peripheral edema) caused by a structural and/or functional cardiac abnormality.

\*\* Rhabdomyolysis will be diagnosed if the muscle pain or muscle weakness took place on admission and the creatine kinase level was greater than 10 times the upper limit of normal.

## **Assessment of exposure**

In this study, the history of contact with wildlife will be documented through self-report by the patients. Among the patients who live outside Wuhan, the absolute count and percentage of patients who are the residents of Wuhan, patients who have a recent travel to Wuhan and patients who have a contact with people from Wuhan will be reported, respectively. A recent travel to, nor contact with people from, Wuhan will be inquired among the patients living outside of Wuhan.

## **Sampling and sample size estimation**

Because all laboratory-confirmed cases will have to be reported to the National Health Commission which is the main coordinator of our study, our study population would not be derived from random sampling. Since early this January, the medical staff in Hubei (especially in Wuhan) suffered from a major burn-out of the workload given the rapid surge of cases. A team consisting of three experts of the lead site will be dispatched to Wuhan to assist in extracting the clinical data from the electronic hospital information system.

No previous study has documented the percentage of patients who reach to the composite endpoint or either of the outcome variable. Hence, it would not be possible to estimate for the sample size based on literature reports. However, it is believed that the large sample sizes derived from hospitals across China would be sufficient to power the statistical analysis in our study.

## **Data management**

Data will be collected from the electronic medical records (EMR) or paper-based medical records that managed by the National Health Commission. All medical records will be transmitted or copied and sent to the data processing center in Guangzhou under the coordination of the National Health Commission. All needed variables with necessary explanations will be defined firstly by the research team. An experienced respiratory clinicians team will review the copies of the medical records and abstract the data. The abstracted data will be entered into a computerized database, and double-entry is required for all variables. The data-entry team ensures that all data needed are collected. If the core data were missing, requests of clarification will be immediately sent to the coordinators who subsequently contacted the attending clinicians. Data cleaning, including logical check, outlier check, and variables engineering, will be performed by experienced programmers. An experienced clinician will assist the variables engineering, the original variables will be transformed if need, which may include, but is not restricted to, converting continuous variables to categorical variables, and combining multiple variables into single variables for information integration.

## **Statistical analysis plan**

### **Sampling**

The convenience sampling method will be used because random sampling will not be feasible under the epidemic situation of 2019-nCoV. Sampling frame will include all hospitals which admit the patients with 2019-nCoV infection.

### **Sample size estimation**

The sample size will not be estimated based on the statistical power. We will collect as many cases as possible.

### **Analysis principles**

- All tests are two-sided, the nominal level of type I error will be 5% and the confidence level for all confidence intervals will be 95%.
- There will be no imputing of missing values. The number of observations used in an analysis will be reported.
- Subgroup analyses will be carried out irrespective of whether there is a significant treatment effect on the primary outcome.
- Analyses will be conducted using R packages (version 3.6.2). Distribution map will be plotted by using ArcGis (version 10.2.2).

## **Trial profile**

Flow chart of inclusion will be displayed in a diagram. The report will include the number of patients who met the inclusion criteria and the number of non-included patients. The distribution of laboratory-confirmed cases throughout china will also be reported by using a distribution map.

## **Patients characteristics and baseline comparisons**

Description and statistical inference of the patients' characteristics, radiographic and laboratory findings will be presented by the disease severity and the composite endpoint.

Discrete variables will be summarized by frequencies and percentages. Percentages will be calculated according to the number of patients for whom data is available. Continuous variables will be summarized by median and 25%, 75% quartiles [Median (IQR)].

Statistical inference of continuous variables will be performed using t-test or Wilcoxon rank-sum tests as appropriate. The Pearson's Chi-square test or Fisher exact test will be used, as appropriate, for categorical data.

Baseline measures for all patients will be tabulated.

## **Outcomes**

For the primary outcome of time to the composite endpoint and other outcomes, the multivariable analysis will be performed by Fine-Gray competing-risk models in which recovery will be included as competing for risk. The candidate risk factors include exposure history, age, radiologic and laboratory findings, and the development of complications. Candidate risk factors that are of biological interest (age and sex) or clinically important (smoking status) or statistically significant will be included in the multivariable models. The sub-distribution hazard ratios with 95% confidence interval will be reported.

## **Subgroup analysis**

Subgroup analyses will be carried out for the primary outcome.

Planned subgroup analysis:

- disease severity

## **Sensitivity analysis**

The proportional hazard Cox model analysis will be conducted as sensitivity analyses.

## **Ethics approval**

The study has been approved by the National Health Commission and the institutional board of each participating site. Written informed consent has been waived in light of the urgent need to collect clinical data.

## Data presentation schemes

**Table 1. Clinical characteristics of the patients with 2019-nCoV**

| <b>Clinical characteristics, symptoms or signs</b> | <b>All patients<br/>N=</b> | <b>Mild-moderate<br/>N=</b> | <b>Severe<br/>N=</b> | <b>P value</b> |
|----------------------------------------------------|----------------------------|-----------------------------|----------------------|----------------|
| <b>Age</b>                                         |                            |                             |                      |                |
| <b>Median (range) – yrs</b>                        |                            |                             |                      |                |
| <b>Age groups – No., %</b>                         |                            |                             |                      |                |
| 0-14 yrs                                           |                            |                             |                      | -              |
| 15-49 yrs                                          |                            |                             |                      | -              |
| 50-64 yrs                                          |                            |                             |                      | -              |
| ≥ 65 yrs                                           |                            |                             |                      | -              |
| <b>Female sex – No., %</b>                         |                            |                             |                      |                |
| <b>Current smokers – No., %</b>                    |                            |                             |                      |                |
| <b>Exposure to live poultry</b>                    |                            |                             |                      |                |
| Within previous 14 days – No., %                   |                            |                             |                      |                |
| Median incubation time (IQR) – days                |                            |                             |                      |                |
| <b>Hospitalization – No., %</b>                    |                            |                             |                      |                |
| <b>Recent travel to infected region – No., %</b>   |                            |                             |                      |                |
| None                                               |                            |                             |                      | -              |
| Hubei province                                     |                            |                             |                      | -              |
| Elsewhere                                          |                            |                             |                      | -              |
| <b>Incubation period – days</b>                    |                            |                             |                      |                |
| Median (range)                                     |                            |                             |                      |                |
| <b>On admission</b>                                |                            |                             |                      |                |
| <b>No./Total No. (%)</b>                           |                            |                             |                      |                |
| <b>Respiratory symptoms – No., %</b>               | -                          | -                           | -                    | -              |
| Fever                                              |                            |                             |                      |                |
| 37.5-38.0°C                                        |                            |                             |                      | -              |
| 38.1-39.0°C                                        |                            |                             |                      | -              |
| > 39.0°C                                           |                            |                             |                      | -              |
| Conjunctival congestion                            |                            |                             |                      |                |

|                                       |   |   |   |   |
|---------------------------------------|---|---|---|---|
| Nasal congestion                      |   |   |   |   |
| Rhinorrhea                            |   |   |   |   |
| Headache                              |   |   |   |   |
| Cough                                 |   |   |   |   |
| Sore throat                           |   |   |   |   |
| Sputum production                     |   |   |   |   |
| Fatigue                               |   |   |   |   |
| Hemoptysis                            |   |   |   |   |
| Shortness of breath                   |   |   |   |   |
| Nausea or vomiting                    |   |   |   |   |
| Diarrhea                              |   |   |   |   |
| Myalgia or arthralgia                 |   |   |   |   |
| Chill                                 |   |   |   |   |
| <b>Signs – No., %</b>                 | - | - | - | - |
| Throat congestion                     |   |   |   |   |
| Tonsil swelling                       |   |   |   |   |
| Enlargement of lymph nodes            |   |   |   |   |
| Rash                                  |   |   |   |   |
| <b>Coexisting disorders – No., %</b>  | - | - | - | - |
| Any                                   |   |   |   |   |
| Chronic obstructive pulmonary disease |   |   |   |   |
| Diabetes                              |   |   |   |   |
| Hypertension                          |   |   |   |   |
| Coronary heart disease                |   |   |   |   |
| Cerebrovascular diseases              |   |   |   |   |
| Hepatitis B infection                 |   |   |   |   |
| Cancer                                |   |   |   |   |
| Chronic renal diseases                |   |   |   |   |
| Immunodeficiency                      |   |   |   |   |
| Pregnancy                             |   |   |   |   |

P values denoted the comparison between mild-moderate cases and severe cases.



**Table 2. Radiographic and laboratory testing findings of 2019-nCoV**

| <b>Variables</b>             | <b>All patients<br/>N=</b> | <b>Mild-moderate<br/>N=</b> | <b>Severe<br/>N=</b> | <b>P value</b> |
|------------------------------|----------------------------|-----------------------------|----------------------|----------------|
| <b>Radiographic findings</b> | -                          | -                           | -                    | -              |

|                                                                       |   |   |   |   |
|-----------------------------------------------------------------------|---|---|---|---|
| <b>Abnormalities on chest X-ray – No./total No. (%)</b>               |   |   |   |   |
| Ground-glass opacities                                                |   |   |   |   |
| Local patchy shadowing                                                |   |   |   |   |
| Diffuse patchy shadowing                                              |   |   |   |   |
| Interstitial abnormalities                                            |   |   |   |   |
| <b>Abnormalities on chest CT – No./total No. (%)</b>                  |   |   |   |   |
| Ground-glass opacities                                                |   |   |   |   |
| Local patchy shadowing                                                |   |   |   |   |
| Diffuse patchy shadowing                                              |   |   |   |   |
| Interstitial abnormalities                                            |   |   |   |   |
| <b>Laboratory findings</b>                                            | - | - | - | - |
| <b>Median PaO<sub>2</sub>: FiO<sub>2</sub> (interquartile range)</b>  |   |   |   |   |
| <b>Blood leukocyte count</b>                                          | - | - | - | - |
| Median, interquartile range – per mm <sup>3</sup>                     |   |   |   |   |
| >10,000 per mm <sup>3</sup> – No., %                                  |   |   |   |   |
| <4,000 per mm <sup>3</sup> – No., %                                   |   |   |   |   |
| <b>Lymphocyte count</b>                                               | - | - | - | - |
| Median, interquartile range – per mm <sup>3</sup>                     |   |   |   |   |
| Lymphocytopenia – No., %                                              |   |   |   |   |
| CD4+T lymphocyte count – per mm <sup>3</sup>                          |   |   |   |   |
| CD8+T lymphocyte count – per mm <sup>3</sup>                          |   |   |   |   |
| CD4:CD8 ratio <1.4 – No./total No. (%)                                |   |   |   |   |
| <b>Platelet count</b>                                                 | - | - | - | - |
| Median, interquartile range – per mm <sup>3</sup>                     |   |   |   |   |
| Thrombocytopenia – No., %                                             |   |   |   |   |
| <b>Haemoglobin level – g/dl</b>                                       |   |   |   |   |
| <b>C-reactive protein level ≥ 10 mg/liter – No./total No. (%)</b>     |   |   |   |   |
| <b>Procalcitonin level ≥ 0.5 ng/ml – No./total No. (%)</b>            |   |   |   |   |
| <b>Lactose dehydrogenase ≥ 250 U/liter – No./total No. (%)</b>        |   |   |   |   |
| <b>Aspartate aminotransferase &gt; 40 U/liter – No./total No. (%)</b> |   |   |   |   |
| <b>Alanine aminotransferase &gt; 40 U/liter – No./total No. (%)</b>   |   |   |   |   |

|                                                            |  |  |  |  |
|------------------------------------------------------------|--|--|--|--|
| <b>Total bilirubin 17.1 µmol/liter – No./total No. (%)</b> |  |  |  |  |
| <b>Creatinine kinase ≥ 200 U/liter – No./total No. (%)</b> |  |  |  |  |
| <b>Creatinine ≥ 133 µmol/liter – No./total No. (%)</b>     |  |  |  |  |
| <b>D-dimer ≥ 0.5 mg/liter – No./total No. (%)</b>          |  |  |  |  |
| <b>Sodium – mmol/liter</b>                                 |  |  |  |  |
| <b>Potassium – mmol/liter</b>                              |  |  |  |  |
| <b>Chloride – mmol/liter</b>                               |  |  |  |  |

P values denoted the comparison between mild-moderate cases and severe cases.

**Table 3. Complications, treatment and clinical outcomes of patients with 2019-nCoV**

| <b>Characteristics</b> | <b>All patients</b> | <b>Mild-moderate</b> | <b>Severe</b> | <b>P value</b> |
|------------------------|---------------------|----------------------|---------------|----------------|
|                        | <b>N=</b>           | <b>N=</b>            | <b>N=</b>     |                |

|                                                                  |   |   |   |   |
|------------------------------------------------------------------|---|---|---|---|
| <b>Complications – No., %</b>                                    |   |   |   |   |
| Septic shock                                                     |   |   |   |   |
| Pneumonia                                                        |   |   |   |   |
| Acute respiratory distress syndrome                              |   |   |   |   |
| Acute kidney injury                                              |   |   |   |   |
| Disseminated intravascular coagulation                           |   |   |   |   |
| Rhabdomyolysis                                                   |   |   |   |   |
| <b>Treatment – No., %</b>                                        |   |   |   |   |
| <b>Administration of intravenous antibiotics</b>                 |   |   |   |   |
| <b>Timing from onset of illness to antibiotic administration</b> |   |   |   |   |
| 0-2 days                                                         |   |   |   |   |
| 3 days or longer                                                 |   |   |   |   |
| Administration of oseltamivir                                    |   |   |   |   |
| <b>Timing from onset of illness to antiviral administration</b>  |   |   |   |   |
| 0-2 days                                                         |   |   |   |   |
| 3 days or longer                                                 |   |   |   |   |
| <b>Administration of antifungal medications</b>                  |   |   |   |   |
| <b>Administration of systemic corticosteroids</b>                |   |   |   |   |
| Maximal corticosteroid dose > 0.1g per day                       |   |   |   |   |
| <b>Oxygen therapy</b>                                            |   |   |   |   |
| <b>Mechanical ventilation</b>                                    |   |   |   |   |
| Non-invasive                                                     |   |   |   |   |
| Invasive                                                         |   |   |   |   |
| <b>Intensive care unit admission</b>                             |   |   |   |   |
| <b>Use of extracorporeal membrane oxygenation</b>                |   |   |   |   |
| <b>Use of continuous renal replacement therapy</b>               |   |   |   |   |
| <b>Use of intravenous immunoglobulin</b>                         |   |   |   |   |
| <b>Clinical outcomes</b>                                         | - | - | - | - |
| Discharge from hospital                                          |   |   |   |   |
| Death                                                            |   |   |   |   |
| Cause of death                                                   | - | - | - | - |

|                                          |  |  |  |  |
|------------------------------------------|--|--|--|--|
| Respiratory failure                      |  |  |  |  |
| Secondary bacterial or fungal infections |  |  |  |  |
| Acute heart failure                      |  |  |  |  |
| Acute kidney failure                     |  |  |  |  |
| Shock                                    |  |  |  |  |
| Coagulopathy                             |  |  |  |  |

**Table 4. Multivariate risk factors associated with the development of acute respiratory distress syndrome and mortality**

| Risk factor                                                                 | Acute respiratory distress syndrome |       |         | Mortality |       |         |
|-----------------------------------------------------------------------------|-------------------------------------|-------|---------|-----------|-------|---------|
|                                                                             | OR                                  | 95%CI | P value | OR        | 95%CI | P value |
| Age                                                                         |                                     |       |         |           |       |         |
| Any coexisting medical conditions                                           |                                     |       |         |           |       |         |
| Duration of disease > XX days                                               |                                     |       |         |           |       |         |
| Time from onset of symptoms to initiation of antiviral medications > X days |                                     |       |         |           |       |         |
| Alanine or aspartate aminotransferase level > 40 U/liter                    |                                     |       |         |           |       |         |
| Blood leukocyte count < $1 \times 10^9/L$                                   |                                     |       |         |           |       |         |
| Blood lymphocyte count < $1 \times 10^9/L$                                  |                                     |       |         |           |       |         |
| Serum creatinine level > XX U/liter                                         |                                     |       |         |           |       |         |

**Table 5. Summary characteristics of 2019-nCoV, SARS-CoV, MERS-CoV and highly pathogenic influenza**

| <b>Clinical characteristics</b>        | <b>2019-nCoV</b> | <b>SARS-CoV</b> | <b>MERS-CoV</b> | <b>Highly pathogenic influenza</b> |
|----------------------------------------|------------------|-----------------|-----------------|------------------------------------|
| Median incubation period (days)        |                  |                 |                 |                                    |
| Median age (yrs)                       |                  |                 |                 |                                    |
| % of the elderly people                |                  |                 |                 |                                    |
| Median period of viral shedding (days) |                  |                 |                 |                                    |
| High-grade fever (%)                   |                  |                 |                 |                                    |
| Gastrointestinal symptoms (%)          |                  |                 |                 |                                    |
| Leukopenia (%)                         |                  |                 |                 |                                    |
| Lymphocytopenia (%)                    |                  |                 |                 |                                    |
| Thrombocytopenia (%)                   |                  |                 |                 |                                    |
| Abnormal liver function (%)            |                  |                 |                 |                                    |
| Coagulatory disorders (%)              |                  |                 |                 |                                    |
| Needing invasive ventilation (%)       |                  |                 |                 |                                    |
| Needing EMCO (%)                       |                  |                 |                 |                                    |
| Needing NRRT (%)                       |                  |                 |                 |                                    |
| Mortality (%)                          |                  |                 |                 |                                    |

**Table E1. Clinical characteristics of patients with 2019-nCoV stratified by clinical outcomes**

| <b>Clinical characteristics, symptoms or signs</b> | <b>Alive<br/>N=</b> | <b>Died<br/>N=</b> | <b>P value</b> |
|----------------------------------------------------|---------------------|--------------------|----------------|
| <b>Age</b>                                         |                     |                    |                |
| <b>Median (range) – yrs</b>                        |                     |                    |                |
| <b>Age groups – No., %</b>                         |                     |                    |                |
| 0-14 yrs                                           |                     |                    | -              |
| 15-49 yrs                                          |                     |                    | -              |
| 50-64 yrs                                          |                     |                    | -              |
| ≥ 65 yrs                                           |                     |                    | -              |
| <b>Female sex – No.,%</b>                          |                     |                    |                |
| <b>Current smokers – No., %</b>                    |                     |                    |                |
| <b>Exposure to live poultry</b>                    |                     |                    |                |
| Within previous 14 days – No., %                   |                     |                    |                |
| Median incubation time (IQR) – days                |                     |                    |                |
| <b>Hospitalization – No., %</b>                    |                     |                    |                |
| <b>Recent travel to infected region – No., %</b>   |                     |                    |                |
| None                                               |                     |                    | -              |
| Hubei province                                     |                     |                    | -              |
| Elsewhere                                          |                     |                    | -              |
| <b>Incubation period – days</b>                    |                     |                    |                |
| Median (range)                                     |                     |                    |                |
| <b>On admission</b>                                |                     |                    |                |
| <b>No./Total No. (%)</b>                           |                     |                    |                |
| <b>Respiratory symptoms – No., %</b>               |                     |                    |                |
| Fever                                              | -                   | -                  | -              |
| 37.5-38.0°C                                        |                     |                    | -              |
| 38.1-39.0°C                                        |                     |                    | -              |
| > 39.0°C                                           |                     |                    | -              |
| Conjunctival congestion                            |                     |                    |                |



|                                       |   |   |   |
|---------------------------------------|---|---|---|
| Nasal congestion                      |   |   |   |
| Rhinorrhea                            |   |   |   |
| Headache                              |   |   |   |
| Cough                                 |   |   |   |
| Sore throat                           |   |   |   |
| Sputum production                     |   |   |   |
| Fatigue                               |   |   |   |
| Hemoptysis                            |   |   |   |
| Shortness of breath                   |   |   |   |
| Nausea or vomiting                    |   |   |   |
| Diarrhea                              |   |   |   |
| Myalgia or arthralgia                 |   |   |   |
| Chill                                 |   |   |   |
| <b>Signs – No., %</b>                 | - | - | - |
| Throat congestion                     |   |   |   |
| Tonsil swelling                       |   |   |   |
| Enlargement of lymph nodes            |   |   |   |
| Rash                                  |   |   |   |
| <b>Coexisting disorders – No., %</b>  | - | - | - |
| Any                                   |   |   |   |
| Chronic obstructive pulmonary disease |   |   |   |
| Diabetes                              |   |   |   |
| Hypertension                          |   |   |   |
| Coronary heart disease                |   |   |   |
| Cerebrovascular diseases              |   |   |   |
| Hepatitis B infection                 |   |   |   |
| Cancer                                |   |   |   |
| Chronic renal diseases                |   |   |   |
| Immunodeficiency                      |   |   |   |
| Pregnancy                             |   |   |   |



**Table E2. Radiographic and laboratory testing findings of patients with 2019-nCoV stratified by clinical outcomes**

| <b>Variables</b>                                                     | <b>Alive<br/>N=</b> | <b>Died<br/>N=</b> | <b>P value</b> |
|----------------------------------------------------------------------|---------------------|--------------------|----------------|
| <b>Radiographic findings</b>                                         |                     |                    |                |
| <b>Abnormalities on chest X-ray – No./total No. (%)</b>              |                     |                    |                |
| Ground-glass opacities                                               |                     |                    |                |
| Local patchy shadowing                                               |                     |                    |                |
| Diffuse patchy shadowing                                             |                     |                    |                |
| Interstitial abnormalities                                           |                     |                    |                |
| <b>Abnormalities on chest CT – No./total No. (%)</b>                 |                     |                    |                |
| Ground-glass opacities                                               |                     |                    |                |
| Local patchy shadowing                                               |                     |                    |                |
| Diffuse patchy shadowing                                             |                     |                    |                |
| Interstitial abnormalities                                           |                     |                    |                |
| <b>Laboratory findings</b>                                           |                     |                    |                |
| <b>Median PaO<sub>2</sub>: FiO<sub>2</sub> (interquartile range)</b> |                     |                    |                |
| <b>Blood leukocyte count</b>                                         | -                   | -                  | -              |
| Median, interquartile range – per mm <sup>3</sup>                    |                     |                    |                |
| >10,000 per mm <sup>3</sup> – No., %                                 |                     |                    |                |
| <4,000 per mm <sup>3</sup> – No., %                                  |                     |                    |                |
| <b>Lymphocyte count</b>                                              | -                   | -                  | -              |
| Median, interquartile range – per mm <sup>3</sup>                    |                     |                    |                |
| Lymphocytopenia – No., %                                             |                     |                    |                |
| CD4+T lymphocyte count – per mm <sup>3</sup>                         |                     |                    |                |
| CD8+T lymphocyte count – per mm <sup>3</sup>                         |                     |                    |                |
| CD4:CD8 ratio <1.4 – No./total No. (%)                               |                     |                    |                |
| <b>Platelet count</b>                                                | -                   | -                  | -              |
| Median, interquartile range – per mm <sup>3</sup>                    |                     |                    |                |
| Thrombocytopenia – No., %                                            |                     |                    |                |

|                                                                                       |  |  |  |
|---------------------------------------------------------------------------------------|--|--|--|
| <b>Haemoglobin level – g/dl</b>                                                       |  |  |  |
| <b>C-reactive protein level <math>\geq</math> 10 mg/liter – No./total No. (%)</b>     |  |  |  |
| <b>Procalcitonin level <math>\geq</math> 0.5 ng/ml – No./total No. (%)</b>            |  |  |  |
| <b>Lactose dehydrogenase <math>\geq</math> 250 U/liter – No./total No. (%)</b>        |  |  |  |
| <b>Aspartate aminotransferase <math>&gt;</math> 40 U/liter – No./total No. (%)</b>    |  |  |  |
| <b>Alanine aminotransferase <math>&gt;</math> 40 U/liter – No./total No. (%)</b>      |  |  |  |
| <b>Total bilirubin 17.1 <math>\mu</math>mol/liter – No./total No. (%)</b>             |  |  |  |
| <b>Creatinine kinase <math>\geq</math> 200 U/liter – No./total No. (%)</b>            |  |  |  |
| <b>Creatinine <math>\geq</math> 133 <math>\mu</math>mol/liter – No./total No. (%)</b> |  |  |  |
| <b>D-dimer <math>\geq</math> 0.5 mg/liter – No./total No. (%)</b>                     |  |  |  |
| <b>Sodium – mmol/liter</b>                                                            |  |  |  |
| <b>Potassium – mmol/liter</b>                                                         |  |  |  |
| <b>Chloride – mmol/liter</b>                                                          |  |  |  |

**Table E3. Complications, treatment and clinical outcomes of patients with 2019-nCoV stratified by clinical outcomes**

| <b>Characteristics</b>                                           | <b>Alive<br/>N=</b> | <b>Died<br/>N=</b> | <b>P value</b> |
|------------------------------------------------------------------|---------------------|--------------------|----------------|
| <b>Complications – No., %</b>                                    |                     |                    |                |
| Septic shock                                                     |                     |                    |                |
| Pneumonia                                                        |                     |                    |                |
| Acute respiratory distress syndrome                              |                     |                    |                |
| Acute kidney injury                                              |                     |                    |                |
| Disseminated intravascular coagulation                           |                     |                    |                |
| Rhabdomyolysis                                                   |                     |                    |                |
| <b>Treatment – No., %</b>                                        |                     |                    |                |
| <b>Administration of intravenous antibiotics</b>                 |                     |                    |                |
| <b>Timing from onset of illness to antibiotic administration</b> |                     |                    |                |
| 0-2 days                                                         |                     |                    |                |
| 3 days or longer                                                 |                     |                    |                |
| Administration of oseltamivir                                    |                     |                    |                |
| <b>Timing from onset of illness to antiviral administration</b>  |                     |                    |                |
| 0-2 days                                                         |                     |                    |                |
| 3 days or longer                                                 |                     |                    |                |
| <b>Administration of antifungal medications</b>                  |                     |                    |                |
| <b>Administration of systemic corticosteroids</b>                |                     |                    |                |
| Maximal corticosteroid dose > 0.1g per day                       |                     |                    |                |
| <b>Oxygen therapy</b>                                            |                     |                    |                |
| <b>Mechanical ventilation</b>                                    |                     |                    |                |
| Non-invasive                                                     |                     |                    |                |
| Invasive                                                         |                     |                    |                |
| <b>Intensive care unit admission</b>                             |                     |                    |                |
| <b>Use of extracorporeal membrane oxygenation</b>                |                     |                    |                |

|                                                    |   |   |   |
|----------------------------------------------------|---|---|---|
| <b>Use of continuous renal replacement therapy</b> |   |   |   |
| <b>Use of intravenous immunoglobulin</b>           |   |   |   |
| <b>Clinical outcomes</b>                           |   |   |   |
| Discharge from hospital                            |   |   |   |
| Death                                              |   |   |   |
| Cause of death                                     | - | - | - |
| Respiratory failure                                |   |   |   |
| Secondary bacterial or fungal infections           |   |   |   |
| Acute heart failure                                |   |   |   |
| Acute kidney failure                               |   |   |   |
| Shock                                              |   |   |   |
| Coagulopathy                                       |   |   |   |
